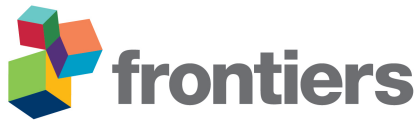

# Diffantom: whole-brain diffusion MRI phantoms derived from real datasets of the Human Connectome Project

Oscar Esteban<sup>1,2,\*</sup>, Emmanuel Caruyer<sup>3</sup>, Alessandro Daducci<sup>4</sup>, Meritxell Bach-Cuadra<sup>4,5</sup>, María-J. Ledesma-Carbayo<sup>1,2</sup> and Andres Santos<sup>1,2</sup>

<sup>1</sup>Biomedical Image Technologies (BIT), ETSI Telecom., Universidad Politécnica de Madrid, Madrid, Spain

<sup>2</sup>Centro de Investigación Biomédica en Red en Bioingeniería, Biomateriales y Nanomedicina (CIBER-BBN), Spain

<sup>3</sup>CNRS, IRISA (UMR 6074), VisAGeS research group, Rennes, France

<sup>4</sup>Signal Processing Laboratory (LTS5), École Polytechnique Fédérale de Lausanne (EPFL), Lausanne, Switzerland

<sup>5</sup>Dept. of Radiology, CIBM, University Hospital Center (CHUV) and University of Lausanne (UNIL), Lausanne, Switzerland

Corresponding Author\*:

Oscar Esteban

Biomedical Image Technologies (BIT), ETSI Telecomunicación, Av. Complutense 30, C203, E28040 Madrid, Spain, [phd@oscaresteban.es](mailto:phd@oscaresteban.es)

## INTRODUCTION

1 Fiber tracking on diffusion MRI (dMRI) data has become an important tool for the *in-vivo* investigation  
2 of the structural configuration of fiber bundles at the macroscale. Tractography is fundamental to gain  
3 information about white matter (WM) morphology in many clinical applications like neurosurgical planning  
4 (Golby et al., 2011), post-surgery evaluations (Toda et al., 2014), and the study of neurological diseases as  
5 in (Chua et al., 2008) addressing multiple sclerosis and Alzheimer's disease. The analysis of structural brain  
6 networks using graph theory is also applied on tractography, for instance in the definition of the unique  
7 subject-wise patterns of connectivity (Sporns et al., 2005), in the assessment of neurological diseases  
8 (Griffa et al., 2013), and in the study of the link between structural and functional connectivity (Messé  
9 et al., 2015). However, the development of the field is limited by the lack of a gold standard to test and  
10 compare the wide range of methodologies available for processing and analyzing dMRI.

11 Large efforts have been devoted to the development of physical phantoms (Lin et al., 2001; Campbell  
12 et al., 2005; Perrin et al., 2005; Fieremans et al., 2008; Tournier et al., 2008). Côté et al. (2013) conducted a  
13 thorough review of tractography methodologies using the so-called *FiberCup* phantom (Poupon et al., 2008;  
14 Fillard et al., 2011). These phantoms are appropriate to evaluate the angular resolution in fiber crossings  
15 and accuracy of direction-independent scalar parameters in very simplistic geometries. Digital simulations  
16 are increasingly popular because the complexity of whole-brain tractography can not be accounted for  
17 with current materials and proposed methodologies to build physical phantoms. Early digital phantoms  
18 started with simulation of simple geometries (Basser et al., 2000; Gössl et al., 2002; Tournier et al., 2002;  
19 Leemans et al., 2005) to evaluate the angular resolution as well. These tools generally implemented the  
20 multi-tensor model (Alexander et al., 2001; Tuch et al., 2002) to simulate fiber crossing, fanning, kissing,

21 etc. Close et al. (2009) presented the *Numerical Fibre Generator*, a software to simulate spherical shapes  
22 filled with digital fiber tracts. Caruyer et al. (2014) proposed *Phantomas* to simulate any kind of analytic  
23 geometry inside a sphere. *Phantomas* models diffusion by a restricted and a hindered compartment, similar  
24 to (Assaf and Basser, 2005). Wilkins et al. (2014) proposed a whole-brain simulated phantom derived  
25 from voxel-wise orientation of fibers averaged from real dMRI scans and the multi-tensor model with  
26 a compartment of isotropic diffusion. Neher et al. (2014) proposed *FiberFox*, a visualization software  
27 to develop complex geometries and their analytical description. Once the geometries are obtained, the  
28 software generates the corresponding dMRI signal with a methodology very close to that implemented  
29 in *Phantomas*. An interesting outcome of *FiberFox* is the phantom dataset<sup>1</sup> created for the Tractography  
30 Challenge held in ISMRM 2015. This dataset was derived from the tractography extracted in one Human  
31 Connectome Project (HCP, Van Essen et al. (2012)) dataset. In the tractogram, 25 fiber bundles of interest  
32 were manually segmented by experts. Using *FiberFox*, the segmentation of each bundle was mapped to an  
33 analytical description, and finally simulated the signal.

34 In this data report we present *Diffantom*, an *in-silico* dataset to assess tractography and connectivity  
35 pipelines using dMRI real data as source microstructural information. *Diffantom* is inspired by the work of  
36 Wilkins et al. (2014), with two principal novelties. First, since we use a dataset from the HCP as input,  
37 data are already corrected for the most relevant distortions. The second improvement is a more advanced  
38 signal model to generate the phantom using the hindered and restricted diffusion model of *Phantomas*  
39 (Caruyer et al., 2014). As a result, we provide a whole-brain digital phantom of dMRI data with structural  
40 information derived from an HCP dataset. We also openly release the *diffantomizer* workflow, the software  
41 package necessary to generate custom *diffantoms*. *Diffantom* is originally designed for the investigation of  
42 susceptibility-derived distortions, a typical artifact that produces geometrical warping in certain regions of  
43 dMRI datasets. In (Esteban et al., 2014) we addressed this phenomenon and concluded that the connectivity  
44 matrix of *Phantomas* was not dense enough to evaluate the integration of correction methods in pipelines  
45 for the connectome extraction.

## DATA DESCRIPTION

46 **Microstructural model:** The simulation process relies on a microstructural model derived from real data.  
47 On one hand, the *diffantomizer* workflow requires up to five fraction maps  $\{T_j \mid j \in \{1, \dots, 5\}\}$  of free-  
48 and hindered- diffusion (see Figure 1, panel A). These compartments will be derived from the macroscopic  
49 structure of tissues within the brain, specified in the following order<sup>2</sup>: cortical gray matter (cGM), deep  
50 gray matter (dGM), WM, cerebrospinal fluid (CSF), and abnormal tissue<sup>3</sup>. On the other hand, the restricted-  
51 diffusion compartments are specified by up to three volume fractions  $\{F_i \mid i \in \{1, 2, 3\}\}$  of three single  
52 fiber populations per voxel along with their corresponding direction maps  $\{\mathbf{V}_i \mid i \in \{1, 2, 3\}\}$ .

53 The process to obtain the microstructural model from one dataset of the HCP can be described as follows  
54 (see also Figure 1, panel B): 1) The fiber orientation maps  $\{\mathbf{V}_i\}$  and their corresponding estimations of  
55 volume fraction  $\{F'_i\}$  are obtained using the ball-and-stick model for multi-shell data of BEDPOSTX  
56 (Bayesian Estimation of Diffusion Parameters Obtained using Sampling Techniques modelling crossing  
57 –X– fibres, Jbabdi et al. (2012)) on the dMRI data. The HCP recommends BEDPOSTX to reconstruct their  
58 data (Glasser et al., 2013). A further advantage is that BEDPOSTX exploits the multi-shell acquisitions of  
59 the HCP while operating at whole-brain level. 2) A fractional anisotropy (FA) map is obtained after fitting

<sup>1</sup> Available at [http://www.tractometer.org/ismrm\\_2015\\_challenge/](http://www.tractometer.org/ismrm_2015_challenge/)

<sup>2</sup> Corresponding to the *5TT format* established with the latest version 3.0 of *MRTrix* (Tournier et al., 2012)

<sup>3</sup> Since here we simulate healthy subjects, the last fraction map  $T_5$  is empty and can be omitted

60 a tensor model with *MRTrix*. As we shall see in the Appendix, the FA is used to infer  $F_1$  (the fraction map  
61 of the most prevalent fiber), avoiding the extremely noisy estimation of  $F'_1$  performed by BEDPOSTX in  
62 the previous step. 3) The original fiber fractions  $\{F'_i\}$  and the FA map are denoised with a nonlocal means  
63 filter included in *dipy* (Garyfallidis et al., 2014). This step produces an important smoothing of the maps,  
64 while preserving the edges. Smoothing is also beneficial in simplifying the voxel-wise diffusion model. 4)  
65 The macrostructural fractions  $\{T'_j\}$  are extracted from the T1-weighted image of the dataset, using standard  
66 *FSL* segmentation tools (Jenkinson et al., 2012). 5) The images obtained previously (FA map,  $\{V_i\}$ ,  $\{F'_i\}$ ,  
67 and  $\{T'_j\}$ ) are combined as described in the Appendix to generate the final microstructural model ( $\{V_i\}$ ,  
68  $\{F_i\}$ , and  $\{T_j\}$ ), presented in Figure 1-A.

69 **Diffusion signal generation:** Once a microstructural model of the subject has been synthesized, the fiber  
70 orientation maps  $\{V_i\}$  are weighted by the fiber-fraction maps  $\{F_i\}$  and projected onto a continuous  
71 representation of the fiber orientation distributions (FODs). A close-up showing how the FODs map looks  
72 is presented in Figure 1B. The single fiber response is a Gaussian diffusion tensor with axial symmetry  
73 and eigenvalues  $\lambda_1 = 2.2 \cdot 10^{-3} \text{ mm}^2\text{s}^{-1}$  and  $\lambda_{2,3} = 0.2 \cdot 10^{-3} \text{ mm}^2\text{s}^{-1}$ . The resulting FODs map is then  
74 combined with the free- and hindered-diffusion compartments corresponding to  $\{T_j\}$ . The free-diffusion  
75 compartment corresponds to the CSF fraction map  $T_4$  and is modeled with isotropic diffusivity  $D_{CSF}$  of  
76  $3.0 \cdot 10^{-3} \text{ mm}^2\text{s}^{-1}$ . The hindered-diffusion compartments correspond to  $\{T_1, T_2, T_3\}$  and are also modeled  
77 with isotropic diffusivity  $D_{WM} = 2.0 \cdot 10^{-4}$ ,  $D_{cGM} = 7.0 \cdot 10^{-4}$  and  $D_{dGM} = 9.0 \cdot 10^{-4}$ , respectively  
78 [ $\text{mm}^2\text{s}^{-1}$ ]. All these values for diffusivity (and the corresponding to the single-fiber response) can be  
79 modified by the user with custom settings. The restricted- and hindered- compartments are then fed into  
80 *Phantomas* (Caruyer et al., 2014) and the final dMRI signal is obtained. By default, diffusion data are  
81 generated using a scheme of 100 directions distributed in one shell with uniform coverage (Caruyer et al.,  
82 2013). Custom one- or multi-shell schemes can be generated supplying the tables of corresponding vectors  
83 and  $b$ -values. Rician noise is also included in *Phantomas*, and the signal-to-noise ratio (SNR) can be set by  
84 the user. The default value for SNR is preset to 30.0.

85 **Implementation and reproducibility:** We also provide the *diffantomizer* workflow, the software package  
86 used to generate *diffantoms*, so that users can regenerate similar datasets with different parameters. This  
87 workflow, presented in Figure 1, is implemented using *nipy* (Gorgolewski et al., 2011) to ensure  
88 reproducibility and usability.

89 **Interpretation and recommended uses:** To illustrate the features of *Diffantom*, the example dataset  
90 underwent a simplified connectivity pipeline including constrained spherical deconvolution (CSD) and  
91 probabilistic tractography from *MRTrix* (Tournier et al., 2012). CSD was reconstructed using 8<sup>th</sup>-order  
92 spherical harmonics, and tractography with  $1.6 \cdot 10^6$  seed points evenly distributed across a dilated mask  
93 of the WM tissue. Figure 2, panels A1 and A3, show the result of the tractography obtained with such  
94 pipeline for the original *Diffantom* and a distorted version. Finally, we applied *tract querier* (Wassermann  
95 et al., 2013) to segment some fiber bundles such as the corticospinal tract (CST) and the forceps minor (see  
96 Figure 2, panels A2, A4). Particularly, due to its location nearby the orbitofrontal lobe, the forceps minor is  
97 generally affected by susceptibility distortions.

98 We recommend *Diffantom* as ground-truth in verification and validation frameworks (Figure 2, panel B)  
99 for testing pipelines. *Diffantom* is applicable in the unit testing of algorithms, the integration testing of  
100 modules in workflows, and the overall system testing. Some potential applications follow:

- 101 • Investigating the impact of different diffusion sampling schemes on the local microstructure model of  
102 choice and on the subsequent global tractography outcome. Since the gradient scheme can be set by

- 103 the user, *Diffantom* can be seen as a mean to translate the so-called *b-matrix* of the source dataset to  
104 any target scheme.
- 105 • Assessment of sensitivity and robustness to imaging artifacts (noise, partial volume effect and  
106 CSF contamination, susceptibility-derived warping, Eddy-currents-derived distortions, etc.) at unit,  
107 integration and systems testing levels.
  - 108 • Using *Diffantom* as in panel B of Figure 2, it is possible to apply binary classification measures  
109 to evaluate the resulting connectivity matrix. Considering the connectivity matrix of the *reference*  
110 *Diffantom* and the resulting matrix of the *test Diffantom*, the receiver operating characteristic (ROC) of  
111 the pipeline can be characterized.
  - 112 • Simulation of pathological brains by altering the microstructural model accordingly (e.g. as tumors  
113 were simulated in Kaus et al. (2000)).
- 114 In order to exemplify one of these intended uses, we also release a *Diffantom* including the susceptibility-  
115 derived distortion in simulation.

## DISCUSSION AND CONCLUSION

116 **Discussion:** Whole-brain, realistic dMRI phantoms are necessary in the developing field of structural  
117 connectomics. *Diffantom* is a derivative of (Wilkins et al., 2014) in terms of methodology for simulation  
118 with two major advances. First, the correctness of the *minimally preprocessed* data (Glasser et al., 2013)  
119 released within the HCP. Wilkins et al. (2014) explicitly state that their original data were not corrected for  
120 certain artifacts, and thus, generated data are affected correspondingly. Second, *Diffantom* implements the  
121 hindered and restricted compartments model (Assaf and Basser, 2005), which is a more complete model  
122 than the multi-tensor diffusion model.

123 A possible competitor to *Diffantom* is the phantom generated for the Tractography Challenge in ISMRM  
124 2015. Similarly to *Diffantom*, the organizers used an HCP subject as source of structural information.  
125 While this phantom is designed for the bundle-wise evaluation of tractography (with the scores defined in  
126 the *Tractometer* (Côté et al., 2013), such as geometrical coverage, valid connections, invalid connections,  
127 missed connections, etc.), *Diffantom* is intended for the connectome-wise evaluation of results, yielding  
128 a tractography with a large number of bundles. Therefore, *Diffantom* and *FiberFox* are complementary  
129 as the hypotheses that can be investigated are different. Moreover, *Diffantom* does not require costly  
130 manual segmentation of bundles, highly demanding in terms of physiology expertise and operation time.  
131 The software workflow released with this data report (the *diffantomizer*) ensures the reproducibility of  
132 *Diffantom* and enables the generation of custom *diffantoms*. The *diffantomizer* is designed for, but not  
133 limited to, use HCP datasets as source of structural information.

134 **Conclusion:** *Diffantom* is a whole-brain digital phantom generated from a dataset from the Human  
135 Connectome Project. *Diffantom* is presented here to be openly and freely distributed along with The  
136 *diffantomizer* workflow to generate new *diffantoms*. We encourage the neuroimage community to contribute  
137 with their own *diffantoms* and share them openly.

## DATA SHARING

138 The first *Diffantom* and its distorted version are available under the Creative Commons Zero licence (CC0)  
139 using the Dryad Digital Repository ([reference here when published](#)). The package is organized following  
140 the BIDS (Brain Imaging Data Structure, Gorgolewski et al. (2015)) standard. The associated software to



141 “diffantomize” real dMRI datasets is available at <https://github.com/oesteban/diffantom>  
142 under an MIT license. *Phantomas* is available in <https://github.com/ecaruyer/Phantomas>  
143 under the revised-BSD license.

## DISCLOSURE

144 The authors declare that the research was conducted in the absence of any commercial or financial  
145 relationships that could be construed as a potential conflict of interest.

## AUTHOR CONTRIBUTIONS

146 All the authors contributed to this study. OE designed the data generation procedure, implemented the  
147 processing pipelines and generated the example dataset. EC implemented *Phantomas* (Caruyer et al., 2014),  
148 helped integrate the project with the simulation routines. OE, EC, AD thoroughly discussed and framed the  
149 aptness of the data in the community. AD, MBC, MJLC, and AS interpreted the resulting datasets. MBC,  
150 MJLC, and AS advised on all aspects of the study.

## ACKNOWLEDGMENTS

151 We thank Gert Wollny for his revision of this work. *Funding*: This study was supported by the  
152 Spanish Ministry of Science and Innovation (projects TEC-2013-48251-C2-2-R and INNPACTO XIORT),  
153 Comunidad de Madrid (TOPUS) and European Regional Development Funds, the Center for Biomedical  
154 Imaging (CIBM) of the Geneva and Lausanne Universities and the EPFL, as well as the Leenaards and  
155 Louis Jeantet Foundations.

## REFERENCES

- Alexander, A. L., Hasan, K. M., Lazar, M., Tsuruda, J. S., and Parker, D. L. (2001). Analysis of partial volume effects in diffusion-tensor MRI. *Magn Reson Med* 45, 770–780. doi:10.1002/mrm.1105
- Assaf, Y. and Basser, P. J. (2005). Composite hindered and restricted model of diffusion (CHARMED) MR imaging of the human brain. *NeuroImage* 27, 48–58. doi:10.1016/j.neuroimage.2005.03.042
- Basser, P. J., Pajevic, S., Pierpaoli, C., Duda, J., and Aldroubi, A. (2000). In vivo fiber tractography using DT-MRI data. *Magn Reson Med* 44, 625–632. doi:10.1002/1522-2594(200010)44:4 extless625::AID-MRM17 extgreater3.0.CO;2-O
- Campbell, J. S. W., Siddiqi, K., Rymar, V. V., Sadikot, A. F., and Pike, G. B. (2005). Flow-based fiber tracking with diffusion tensor and q-ball data: Validation and comparison to principal diffusion direction techniques. *NeuroImage* 27, 725–736. doi:10.1016/j.neuroimage.2005.05.014
- Caruyer, E., Daducci, A., Descoteaux, M., Houde, J.-C., Thiran, J.-P., and Verma, R. (2014). Phantomas: a flexible software library to simulate diffusion MR phantoms. In *23th ISMRM* (Milano, Italy), vol. 23
- Caruyer, E., Lenglet, C., Sapiro, G., and Deriche, R. (2013). Design of multishell sampling schemes with uniform coverage in diffusion MRI. *Magn Reson Med* 69, 1534–1540. doi:10.1002/mrm.24736
- Chua, T. C., Wen, W., Slavin, M. J., and Sachdev, P. S. (2008). Diffusion tensor imaging in mild cognitive impairment and Alzheimer’s disease: a review. *Curr Opin Neurol* 21, 83–92. doi:10.1097/WCO.0b013e3282f4594b
- Close, T. G., Tournier, J.-D., Calamante, F., Johnston, L. A., Mareels, I., and Connelly, A. (2009). A software tool to generate simulated white matter structures for the assessment of fibre-tracking algorithms. *NeuroImage* 47, 1288–1300. doi:10.1016/j.neuroimage.2009.03.077

- Côté, M.-A., Girard, G., Boré, A., Garyfallidis, E., Houde, J.-C., and Descoteaux, M. (2013). Tractometer: Towards Validation of Tractography Pipelines. *Med Image Anal* 17, 844–857. doi:10.1016/j.media.2013.03.009
- Esteban, O., Daducci, A., Caruyer, E., O’Brien, K., Ledesma-Carbayo, M. J., Bach-Cuadra, M., et al. (2014). Simulation-based evaluation of susceptibility distortion correction methods in diffusion MRI for connectivity analysis. In *11th ISBI* (Beijing, China), 738–741. doi:10.1109/ISBI.2014.6867976
- Fieremans, E., De Deene, Y., Delputte, S., Özdemir, M. S., D’Asseler, Y., Vlassenbroeck, J., et al. (2008). Simulation and experimental verification of the diffusion in an anisotropic fiber phantom. *J Magn Reson* 190, 189–199. doi:10.1016/j.jmr.2007.10.014
- Fillard, P., Descoteaux, M., Goh, A., Gouttard, S., Jeurissen, B., Malcolm, J., et al. (2011). Quantitative evaluation of 10 tractography algorithms on a realistic diffusion MR phantom. *NeuroImage* 56, 220–234. doi:10.1016/j.neuroimage.2011.01.032
- Garyfallidis, E., Brett, M., Amirbekian, B., Rokem, A., Van Der Walt, S., Descoteaux, M., et al. (2014). Dipy, a library for the analysis of diffusion MRI data. *Front Neuroinform* 8, 8. doi:10.3389/fninf.2014.00008
- Glasser, M. F., Sotiropoulos, S. N., Wilson, J. A., Coalson, T. S., Fischl, B., Andersson, J. L., et al. (2013). The minimal preprocessing pipelines for the Human Connectome Project. *NeuroImage* 80, 105–124. doi:10.1016/j.neuroimage.2013.04.127
- Golby, A. J., Kindlmann, G., Norton, I., Yarmarkovich, A., Pieper, S., and Kikinis, R. (2011). Interactive Diffusion Tensor Tractography Visualization for Neurosurgical Planning. *Neurosurgery* 68, 496–505. doi:10.1227/NEU.0b013e3182061ebb
- Gorgolewski, K., Burns, C. D., Madison, C., Clark, D., Halchenko, Y. O., Waskom, M. L., et al. (2011). Nipype: a flexible, lightweight and extensible neuroimaging data processing framework in Python. *Front Neuroinform* 5, 13. doi:10.3389/fninf.2011.00013
- Gorgolewski, K. J., Poline, J.-B., Keator, D. B., Nichols, B. N., Auer, T., Craddock, R. C., et al. (2015). Brain Imaging Data Structure - a new standard for describing and organizing human neuroimaging data. In *INCF Neuroinformatics 2015* (Cairns, Australia). doi:10.3389/conf.fnins.2015.91.00056
- Griffa, A., Baumann, P. S., Thiran, J.-P., and Hagmann, P. (2013). Structural connectomics in brain diseases. *NeuroImage* 80, 515–526. doi:10.1016/j.neuroimage.2013.04.056
- Gössl, C., Fahrmeir, L., Pütz, B., Auer, L. M., and Auer, D. P. (2002). Fiber Tracking from DTI Using Linear State Space Models: Detectability of the Pyramidal Tract. *NeuroImage* 16, 378–388. doi:10.1006/nimg.2002.1055
- Jbabdi, S., Sotiropoulos, S. N., Savio, A. M., Graña, M., and Behrens, T. E. J. (2012). Model-based analysis of multishell diffusion MR data for tractography: How to get over fitting problems. *Magn Reson Med* 68, 1846–1855. doi:10.1002/mrm.24204
- Jenkinson, M., Beckmann, C. F., Behrens, T. E., Woolrich, M. W., and Smith, S. M. (2012). FSL. *NeuroImage* 62, 782–790. doi:10.1016/j.neuroimage.2011.09.015
- Kaus, M. R., Nabavi, A., Mamisch, C. T., Wells, W. H., Jolesz, F. A., Kikinis, R., et al. (2000). Simulation of Corticospinal Tract Displacement in Patients with Brain Tumors. In *3rd MICCAI* (Pittsburgh, PA, US), LNCS 1935, 9–18. doi:10.1007/978-3-540-40899-4\_2
- Leemans, A., Sijbers, J., Verhoye, M., Van der Linden, A., and Van Dyck, D. (2005). Mathematical framework for simulating diffusion tensor MR neural fiber bundles. *Magn Reson Med* 53, 944–953. doi:10.1002/mrm.20418

- Lin, C.-P., Tseng, W.-Y. I., Cheng, H.-C., and Chen, J.-H. (2001). Validation of Diffusion Tensor Magnetic Resonance Axonal Fiber Imaging with Registered Manganese-Enhanced Optic Tracts. *NeuroImage* 14, 1035–1047. doi:10.1006/nimg.2001.0882
- Messé, A., Rudrauf, D., Giron, A., and Marrelec, G. (2015). Predicting functional connectivity from structural connectivity via computational models using MRI: An extensive comparison study. *NeuroImage* 111, 65–74. doi:10.1016/j.neuroimage.2015.02.001
- Neher, P. F., Laun, F. B., Stieltjes, B., and Maier-Hein, K. H. (2014). Fiberfox: An Extensible System for Generating Realistic White Matter Software Phantoms. In *MICCAI (Nagoya, Japan)*, vol. 22 of *Mathematics and Visualization*, 105–113. doi:10.1007/978-3-319-02475-2\_10
- Patenaude, B., Smith, S. M., Kennedy, D. N., and Jenkinson, M. (2011). A Bayesian model of shape and appearance for subcortical brain segmentation. *NeuroImage* 56, 907–922. doi:10.1016/j.neuroimage.2011.02.046
- Perrin, M., Poupon, C., Rieul, B., Leroux, P., Constantinesco, A., Mangin, J.-F., et al. (2005). Validation of q-ball imaging with a diffusion fibre-crossing phantom on a clinical scanner. *Philos T Roy Soc B* 360, 881–891. doi:10.1098/rstb.2005.1650
- Poupon, C., Rieul, B., Kezele, I., Perrin, M., Poupon, F., and Mangin, J.-F. (2008). New diffusion phantoms dedicated to the study and validation of high-angular-resolution diffusion imaging (HARDI) models. *Magn Reson Med* 60, 1276–1283. doi:10.1002/mrm.21789
- Sepelband, F., Clark, K. A., Ullmann, J. F., Kurniawan, N. D., Leanage, G., Reutens, D. C., et al. (2015). Brain tissue compartment density estimated using diffusion-weighted MRI yields tissue parameters consistent with histology. *Hum. Brain Mapp.* 36, 3687–3702. doi:10.1002/hbm.22872
- Sporns, O., Tononi, G., and Kötter, R. (2005). The human connectome: A structural description of the human brain. *PLoS Comput. Biol.* 1, e42. doi:10.1371/journal.pcbi.0010042
- Toda, K., Baba, H., Ono, T., and Ono, K. (2014). The utility of diffusion tensor imaging tractography for post-operative evaluation of a patient with hemispherotomy performed for intractable epilepsy. *Brain Dev.* 36, 641–644. doi:10.1016/j.braindev.2013.08.001
- Tournier, J.-D., Calamante, F., and Connelly, A. (2012). MRtrix: Diffusion tractography in crossing fiber regions. *Int J Imag Syst Tech* 22, 53–66. doi:10.1002/ima.22005
- Tournier, J.-D., Calamante, F., King, M., Gadian, D., and Connelly, A. (2002). Limitations and requirements of diffusion tensor fiber tracking: An assessment using simulations. *Magn Reson Med* 47, 701–708. doi:10.1002/mrm.10116
- Tournier, J. D., Yeh, C.-H., Calamante, F., Cho, K.-H., Connelly, A., and Lin, C.-P. (2008). Resolving crossing fibres using constrained spherical deconvolution: Validation using diffusion-weighted imaging phantom data. *NeuroImage* 42, 617–625. doi:10.1016/j.neuroimage.2008.05.002
- Tuch, D., Reese, T., Wiegell, M., Makris, N., Belliveau, J., and Wedeen, V. (2002). High angular resolution diffusion imaging reveals intravoxel white matter fiber heterogeneity. *Magn Reson Med* 48, 577–582. doi:10.1002/mrm.10268
- Van Essen, D., Ugurbil, K., Auerbach, E., Barch, D., Behrens, T., Bucholz, R., et al. (2012). The Human Connectome Project: A data acquisition perspective. *NeuroImage* 62, 2222–2231. doi:10.1016/j.neuroimage.2012.02.018
- Wassermann, D., Makris, N., Rathi, Y., Shenton, M., Kikinis, R., Kubicki, M., et al. (2013). On describing human white matter anatomy: the white matter query language. In *16th MICCAI (Nagoya, Japan)*, LNCS 8149, 647–654. doi:10.1007/978-3-642-40811-3\_81

Wilkins, B., Lee, N., Gajawelli, N., Law, M., and Leporé, N. (2014). Fiber estimation and tractography in diffusion MRI: Development of simulated brain images and comparison of multi-fiber analysis methods at clinical b-values. *NeuroImage* doi:10.1016/j.neuroimage.2014.12.060

Zhang, Y., Brady, M., and Smith, S. (2001). Segmentation of brain MR images through a hidden Markov random field model and the expectation-maximization algorithm. *IEEE Trans Med Imag* 20, 45–57. doi:10.1109/42.906424

## APPENDIX

156 Let  $\{T'_j\}$  be the set of original fractions maps obtained with `act_anat_prepare_fsl`, a tool in *MRTrix*  
157 that combines FAST (FMRIB's Automated Segmentation Tool, Zhang et al. (2001)) and FIRST (FMRIB's  
158 Integrated Registration and Segmentation Tool, Patenaude et al. (2011)) to generate the macrostructural  
159 5TT map. FA denotes the fractional anisotropy (FA) map obtained from the original diffusion MRI (dMRI)  
160 data: the local fiber orientation maps  $\{V_i\}$  with their estimated volume fractions  $\{F'_i\}$  calculated with  
161 BEDPOSTX (Bayesian Estimation of Diffusion Parameters Obtained using Sampling Techniques modelling  
162 crossing –X– fibres, Jbabdi et al. (2012)). The final  $\{T_j\}$  maps of isotropic fractions are computed as  
163 follows:

$$T_1 = (1.0 - f_{cgm}) \cdot T'_1$$

$$T_2 = (1.0 - f_{dgm}) \cdot T'_2$$

$$T_3 = (1.0 - f_{wm}) \cdot T'_3$$

$$T_4 = T'_4$$

$$T_5 = 0.0$$

164 where  $f_{\{cgm,dgm,wm\}}$  are the fractions of restricted diffusion for each tissue. Seppehrband et al. (2015) found  
165 out that the fiber fraction ranges across the corpus callosum from the  $70 \pm 8\%$  in its body to an upper bound  
166 of  $80 \pm 11\%$  in the splenium. Therefore, we choose  $f_{wm} = 80\%$  as default fraction of restricted diffusion  
167 in the white matter (WM). To our knowledge, restricted diffusion fractions have been studied only for  
168 WM. Therefore, we set  $f_{cgm} = 25\%$  and  $f_{dgm} = 50\%$  as they yield plausible FA and anisotropic diffusion  
169 coefficient (ADC) maps, assessed visually. The final  $\{F_i\}$  maps are computed as follows:

$$F_1 = f_{wm} \cdot T_2 \cdot FA + w_{f1}(f_{cgm} \cdot T_1 + f_{dgm} \cdot T_2)$$

$$F_2 = f_{wm} \cdot T_2 - (F_1 + F_3) + w_{f2}(f_{cgm} \cdot T_1 + f_{dgm} \cdot T_2)$$

$$F_3 = f_{wm} \cdot F'_3 + w_{f3}(f_{cgm} \cdot T_1 + f_{dgm} \cdot T_2)$$

170 where  $w_{\{f1,f2,f3\}}$  are the contributions of the gray matter (GM) compartments to each fiber population.  
171 By default:  $w_{f1} = 48\%$ ,  $w_{f2} = 37\%$ ,  $w_{f3} = 15\%$ . Finally, the resulting maps are normalized to fulfill  
172  $\sum_j T_j + \sum_i F_i = 1.0$ .



## **FIGURES**

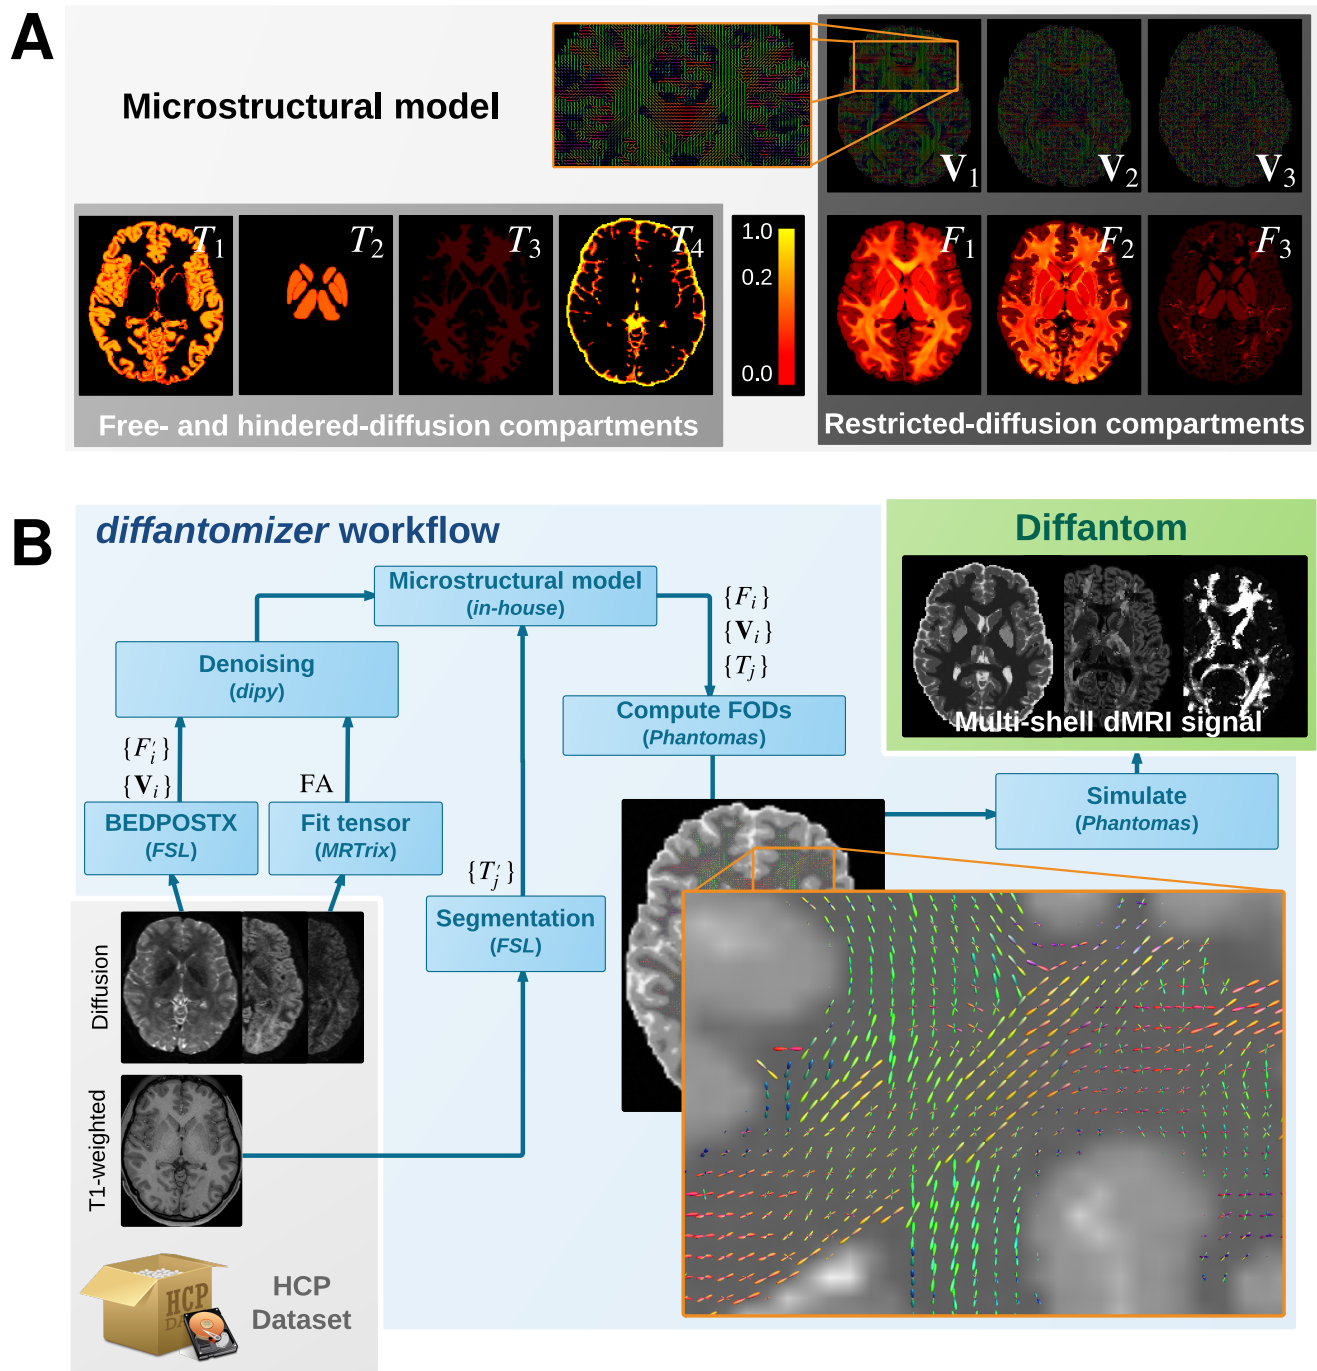

**Figure 1. A. Microstructural model of *Diffantom*.** The phantom is simulated from an underlying microstructural model specified with the following volume-fraction maps: three hindered-diffusion compartments  $\{T_1, T_2, T_3\}$ , one free-diffusion compartment  $T_4$  corresponding to the cerebrospinal fluid (CSF), three restricted-diffusion compartments  $\{F_i\}$ , and three vectorial maps associated with the local fiber directions  $\{V_i\}$ . Please note the piece-wise linear function of the color scale to enable visibility of small volume fractions. **B. The *diffantomizer* workflow, a workflow to generate *diffantoms*.** The pipeline to generate phantoms from any Human Connectome Project (HCP, Van Essen et al. (2012)) dataset is presented in the lower panel. Once the microstructural model shown in the upper panel has been prepared as described in Data description, the local orientations are computed and fed into *Phantoms* to finally simulate the signal.

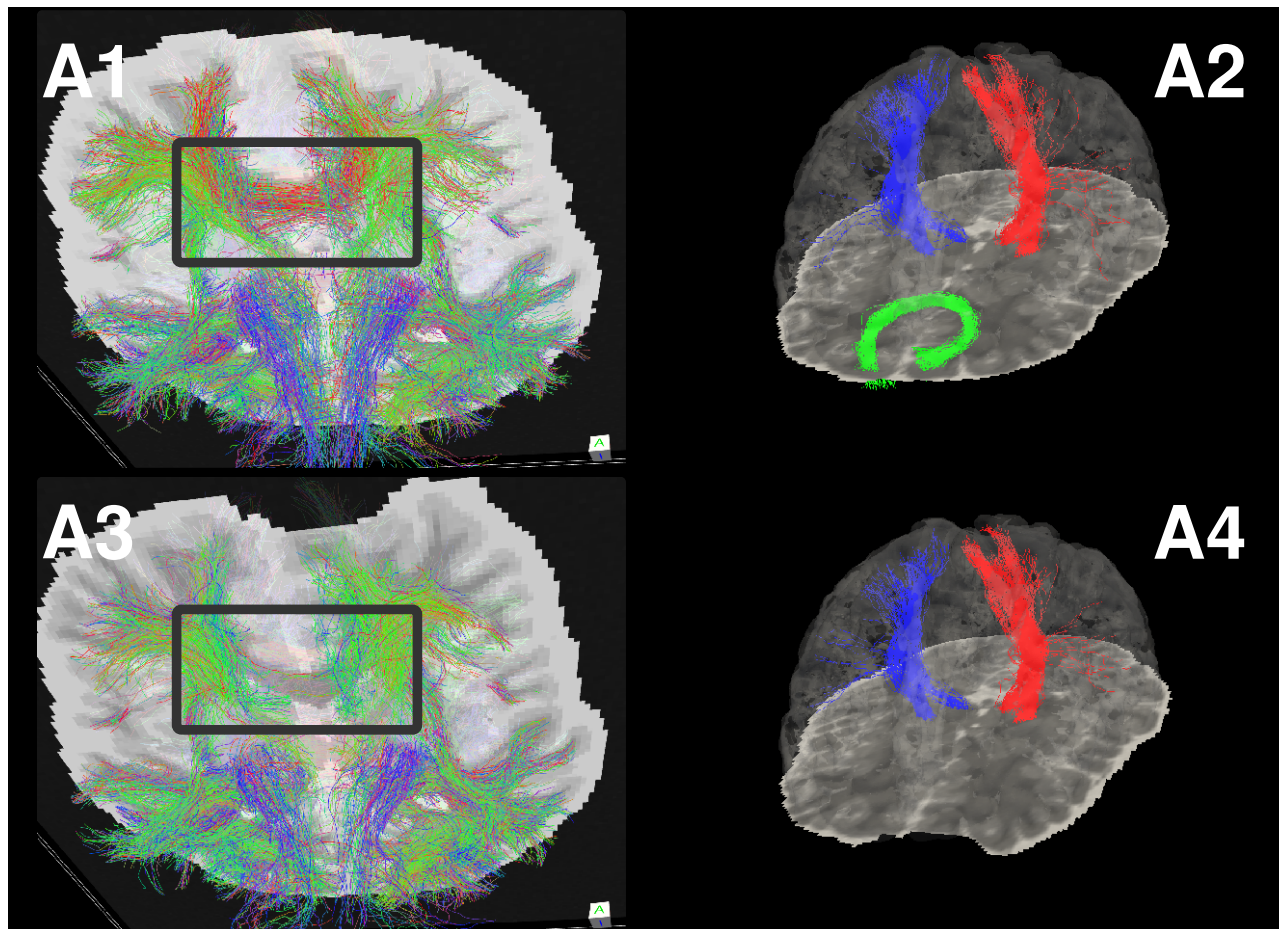

B

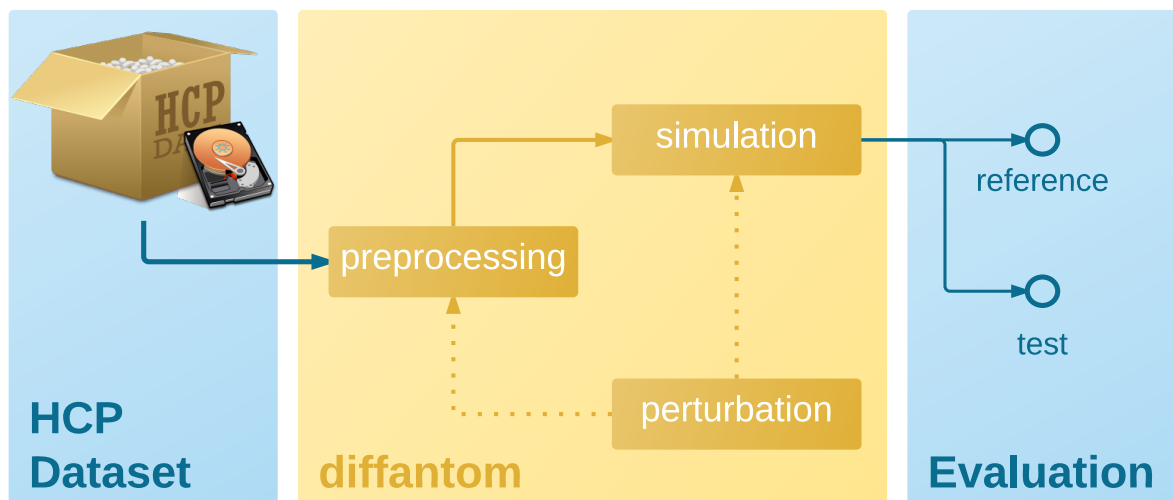

**Figure 2. A. Example dataset.** A1 and A3 show the tractogram of fibers crossing slice 56 of *Diffantom* as extracted with *MRTrix*, represented over the corresponding slice of the  $b_0$  volume for the original (A1) and the distorted (A3) phantoms, with a gray frame highlighting the absence of important tracks. Panels A2 and A4 show the segmentation of the right corticospinal tract (CST) represented with blue streamlines, the left CST (red streamlines), and the forceps minor (green streamlines) using *tract\_querier*. A2 and A4 include the slice 56 of the  $b_0$  and the pial surface is represented with transparency. In the distorted *Diffantom* (A4) the forceps minor was not detected. **B. Recommended use of *Diffantom*.** The phantom is designed to be used as ground-truth information in evaluation frameworks, to implement unit test of algorithms, to check integration of processing units within pipelines or to validate complete workflows. For instance, in order to evaluate artifacts, a perturbation can be induced in the microstructural model or after simulation to provide reference and test datasets.
